# Supplementary material
Source: HighWire-hosted journal article supplement (http://www.jrheum.org/highwire/filestream/34790/field_highwire_adjunct_files/0/180455DataSuppl.pdf)
Supplement: 180455DataSuppl.pdf [file 180455DataSuppl.pdf]

### Supplement A. Local false discovery rate (locfdr) in one dimension

A local false discovery rate (locfdr) is defined from a mixture of distributions. Suppose that we have  $k$  tests each with p-value  $p_i$ , for  $i = 1, 2, \dots, k$ . Let  $z$  be the test statistic of interest (pathways in the manuscript). Each case (or test) can be considered from either null ( $H_0$ ) or alternative ( $H_1$ ) with the prior probabilities of

$$p_0 = \text{probability}(H_0) \text{ and } p_1 = \text{probability}(H_1) = 1 - p_0.$$

Then,  $z$  values have the following mixture density

$$f(z) = p_0 f_0(z) + p_1 f_1(z),$$

where  $f_0(z)$  and  $f_1(z)$  are the null and alternative densities, respectively.

Then, the locfdr is defined as  $\text{locfdr}(z) = \text{probability}\{H_0 \mid Z=z\}$ , where  $Z$  is a test statistic. Under the mixture model above, it is straightforward to show (S1, S2)

$$\text{locfdr}(z) = p_0 f_0(z) / f(z).$$

There can be several different choices of  $f_0$  and  $f_1$ , and ways to estimate them. In our approach,  $f_0$  is a normal distribution and  $f_1$  is a log-concave density function. Then, we estimate  $p_0$ ,  $f_0$  and  $f_1$  by the EM algorithm that is most widely used to estimate a mixture density.

The above is the description of one-dimensional case and the technical report (S1) presents the extension to multi-dimensional cases and simulation studies to show how well our approach can estimate locfdr under various settings and performs better than other existing methods.

### References:

- S1. Jeong S-O, Choi, D., Jang, W. A semiparametric mixture method for local false discovery rate estimation. Arxivorg 2016; Available from: <http://arxiv.org/abs/1604.04264>.
- s2. Efron B. Microarrays, empirical bayes and the two-groups model. *Statist Sci* 2008;23:1-22.

| <b>Supplementary Table 1:</b> Individual genes associated with AAV pathways. |                                                                                                                                                         |                                                                                                                                                                                                                                                                                                                                    |                                                                                                                                          |                        |
|------------------------------------------------------------------------------|---------------------------------------------------------------------------------------------------------------------------------------------------------|------------------------------------------------------------------------------------------------------------------------------------------------------------------------------------------------------------------------------------------------------------------------------------------------------------------------------------|------------------------------------------------------------------------------------------------------------------------------------------|------------------------|
| <b>Pathway</b>                                                               | <b>Peripheral leukocyte genes</b>                                                                                                                       | <b>Nasal sinus brushing genes</b>                                                                                                                                                                                                                                                                                                  | <b>Orbital tissue genes</b>                                                                                                              | <b>md-locfdr*</b>      |
| <b>Innate Immunity</b>                                                       |                                                                                                                                                         |                                                                                                                                                                                                                                                                                                                                    |                                                                                                                                          |                        |
| Neutrophil degranulation(R)                                                  | <i>SLC11A1,SLPI,RAB5C,S100A12,DEFA4,VNN1,TCN1,LCN2,TNFAIP6,PYGL,HK3,CAMP,SERPINB1,ARG1,NFAM1,MMP9,CKAP4,CEACAM8,LTF,TLR2,CD59,MAPK14,LRG1,QPCT,PTX3</i> | <i>GMFG,C3AR1,SLC11A1,FPR1,FPR2,S100A12,CD14,SIGLEC9,SERPINA1,HBB,MMP25,TIMP2,OLR1,CD53,FCER1G,MME,TLR2,CXCR1,ALOX5,CXCR2,LILRB2,LILRB3,QPCT,SIGLEC5,PLAU,COTL1,CD93,CD300A,CLEC4D,TYROBP,A DAM8,S100A9,S100A8,C5AR1,HSPA6,PTPRC,SELL,ITGAM,TNFAIP6,ITGB2,LRMP,FCAR,ITGAX,CR1,PLAUR,TNFRSF1B,MMP9,FGR,CHI3L1,DOCK2,FCGR2A,MNDA</i> | <i>FCN1,CLEC5A,SLC11A1,CLEC4D,ADAM8,LYZ,ARHGAP9,SERPINA1,ITGB2,TCIRG1,SLC2A5,ITGAL,SIRPB1,ITGAX,KCNAB2,MMP9,CHI3L1,TLR2,LILRA3,ALOX5</i> | 1.05x10 <sup>-12</sup> |
|                                                                              |                                                                                                                                                         | p=3.14x10 <sup>-13</sup>                                                                                                                                                                                                                                                                                                           | p= 1.11x10 <sup>-16</sup>                                                                                                                |                        |
| Antimicrobial peptides(R)                                                    | <i>SLC11A1,DEFA4,LCN2,CAMP,LTF,TLR2</i>                                                                                                                 | <i>SLC11A1,TLR2,S100A9,S100A8,DEFA3</i>                                                                                                                                                                                                                                                                                            | <i>SLC11A1,LYZ,CCR2,TLR2</i>                                                                                                             | 8.23x10 <sup>-03</sup> |
|                                                                              |                                                                                                                                                         | p=7.69x10 <sup>-06</sup>                                                                                                                                                                                                                                                                                                           | p=1.13x10 <sup>-03</sup>                                                                                                                 |                        |
| Toll-Like Receptors Cascades(R)                                              | <i>MEF2A,LY96,S100A12,PELI1,TLR10,TLR5,TLR2,MAPK3,MAPK14</i>                                                                                            | <i>S100A12,CD14,FOS,TLR8,TLR4,TLR2,S100A9,S100A8,ITGAM,ITGB2</i>                                                                                                                                                                                                                                                                   | <i>RPS6KA1,ITGB2,IKBKE,TLR8,TLR2,PTPN11</i>                                                                                              | 0.026                  |
|                                                                              |                                                                                                                                                         | p=1.85x10 <sup>-05</sup>                                                                                                                                                                                                                                                                                                           | p=2.78x10 <sup>-04</sup>                                                                                                                 |                        |
| Phagosome(K)                                                                 | <i>RAB5C,TLR2</i>                                                                                                                                       | <i>CD14,OLR1,TLR4,TLR2,NCF2,NCF4,CORO1A,CLEC7A,ITGAM,ITGB2,</i>                                                                                                                                                                                                                                                                    | <i>COMP,CLEC7A,ITGB2,TCIRG1,TLR2</i>                                                                                                     | 3.17x10 <sup>-03</sup> |

Online supplement to Gene Expression Pathways across Multiple Tissues in Antineutrophil Cytoplasmic Antibody-associated Vasculitis Reveal Core Pathways of Disease Pathology, *The Journal of Rheumatology*, doi:10.3899/jrheum.180455

|                                                   |                                                     |                                                                                             |                                                                                 |                        |
|---------------------------------------------------|-----------------------------------------------------|---------------------------------------------------------------------------------------------|---------------------------------------------------------------------------------|------------------------|
|                                                   |                                                     | <i>FCAR,FCGR3A,ITGA5,T<br/>HBS1,FCGR2A,FCGR2B</i>                                           |                                                                                 |                        |
|                                                   | p=0.477                                             | p=2.88x10 <sup>-08</sup>                                                                    | p=0.021                                                                         |                        |
| Interferon gamma signaling(R)                     | <i>SOCS3</i>                                        | <i>SOCS3</i>                                                                                | <i>CIITA,IRF8,PTPN1<br/>,PTPN11</i>                                             | 0.134                  |
|                                                   | p=0.533                                             | p=0.733                                                                                     | p=6.9x10 <sup>-03</sup>                                                         |                        |
| <b>Adaptive Immunity</b>                          |                                                     |                                                                                             |                                                                                 |                        |
| Signaling by the B Cell Receptor (BCR)(R)         | <i>IRS2,MAPK3</i>                                   | <i>PRKCB,EREG,HBEGF</i>                                                                     | <i>IER3,ITPR1,DAPP<br/>1,IGHM,IGLC1,IG<br/>HD,IGKC,PTPN11</i>                   | 0.022                  |
|                                                   | p=0.774                                             | p=0.867                                                                                     | p=6.68x10 <sup>-03</sup>                                                        |                        |
| <b>Vascular wall interactions</b>                 |                                                     |                                                                                             |                                                                                 |                        |
| Cell surface interactions at the vascular wall(R) | <i>CEACAM8</i>                                      | <i>FN1,OLR1,FCER1G,SLC<br/>7A5,SELPLG,SELL,ITGA<br/>M,ITGB2,TREM1,THB<br/>D,ITGAX,ITGA5</i> | <i>CD84,SLC16A3,F<br/>N1,IGHM,ITGB2,I<br/>TGAL,ITGAX,IGLC<br/>1,IGKC,PTPN11</i> | 4.19x10 <sup>-04</sup> |
|                                                   | p=0.887                                             | p=4.49x10 <sup>-04</sup>                                                                    | p=5.86x10 <sup>-05</sup>                                                        |                        |
| amb2 Integrin signaling(N)                        | <i>MMP9</i>                                         | <i>HCK,SELPLG,PLAT,PLA<br/>U,ITGAM,ITGB2,MMP<br/>9</i>                                      | <i>ITGB2,MMP9</i>                                                               | 0.086                  |
|                                                   | p=0.276                                             | p=1.90x10 <sup>-06</sup>                                                                    | p=0.041                                                                         |                        |
| Leukocyte transendothelial migration(K)           | <i>MMP9,MAPK14</i>                                  | <i>PRKCB,PIK3R5,RAC2,C<br/>XCR4,NCF2,NCF4,ITGA<br/>M,ITGB2,MMP9</i>                         | <i>ITGB2,ITGAL,MM<br/>P9,CXCR4,PTPN1<br/>1</i>                                  | 0.178                  |
|                                                   | p=0.34                                              | p=2.94x10 <sup>-04</sup>                                                                    | p=6.98x10 <sup>-03</sup>                                                        |                        |
| <b>Cellular signaling</b>                         |                                                     |                                                                                             |                                                                                 |                        |
| Signaling by Interleukins(R)                      | <i>IL1RN,IRS2,IL18RAP,I<br/>L1R1,IL1R2,CSF2RA,R</i> | <i>IL1RN,IL36A,JUNB,IL1<br/>R2,EREG,FPR1,FN1,IL3</i>                                        | <i>IL1RN,IGHG1,FN<br/>1,IL7R,ITGB2,ITG</i>                                      | 6.13x10 <sup>-04</sup> |

Online supplement to Gene Expression Pathways across Multiple Tissues in Antineutrophil Cytoplasmic Antibody-associated Vasculitis Reveal Core Pathways of Disease Pathology, *The Journal of Rheumatology*, doi:10.3899/jrheum.180455

|                                           |                                                               |                                                                                                                              |                                                                        |                        |
|-------------------------------------------|---------------------------------------------------------------|------------------------------------------------------------------------------------------------------------------------------|------------------------------------------------------------------------|------------------------|
|                                           | <i>ASGRP4,SOCS3,LCN2,RASGEF1A,MMP9,PELI1,MAPK3,OSM,IL18R1</i> | <i>6G,FOS,IL1B,HBEGF,PTGS2,ALOX5,IL10RA,OSM,CSF3R,IL18RAP,CSF2RB,RASGRP4,SOCS3,ITGAM,ITGB2,ITGAX,TNFRSF1B,MMP9,CCL4,CCL3</i> | <i>AX,JAK3,CCR2,MMP9,IL17RA,CCL11,IL2RG,ALOX5,CCL19,IL12RB1,PTPN11</i> |                        |
|                                           | p=8.91x10 <sup>-05</sup>                                      | p=8.24x10 <sup>-08</sup>                                                                                                     | p=1.88x10 <sup>-05</sup>                                               |                        |
| Cytokine-cytokine receptor interaction(K) | <i>CXCL16,IL18RAP,IL1R1,IL1R2,CSF2RA,FLT1,OSM,IL18R1</i>      | <i>IL1R2,IL1B,CXCR4,CXCR1,CXCR2,CCL18,CCL24,IL10RA,OSM,CSF3R,CXCL13,IL18RAP,CSF2RB,TNFRSF10C,TNFRSF1B,CCL4,CCL3</i>          | <i>IL7R,CCR2,IL17RA,LTB,CCL11,CXCR4,IL2RG,IL21R,CCL19,IL12RB1</i>      | 0.036                  |
|                                           | p=6.66x10 <sup>-03</sup>                                      | p=7.78x10 <sup>-06</sup>                                                                                                     | p=4.08x10 <sup>-04</sup>                                               |                        |
| Chemokine signaling pathway(K)            | <i>CXCL16,WAS,MAPK3</i>                                       | <i>PREX1,PRKCB,PIK3R5,RAC2,HCK,CXCR4,CXCR1,CXCR2,CCL18,CCL24,CXCL13,FGR,DOCK2,CCL4,CCL3</i>                                  | <i>GRK6,JAK3,CCR2,CCL11,CXCR4,CCL19</i>                                | 0.041                  |
|                                           | p=0.308                                                       | p=1.97x10 <sup>-06</sup>                                                                                                     | p=0.013                                                                |                        |
| IL4-mediated signaling events(N)          | <i>SPI1,IRS2,SOCS3,ARG1,MAPK14</i>                            | <i>SPI1,EGR2,SOCS3</i>                                                                                                       | <i>IGHG1,HMGA1,JAK3,CCL11,IL2RG</i>                                    | 0.021                  |
|                                           | p=5.47x10 <sup>-04</sup>                                      | p=0.107                                                                                                                      | p=5.04x10 <sup>-04</sup>                                               |                        |
| <b>Complement Activation</b>              |                                                               |                                                                                                                              |                                                                        |                        |
| Complement and coagulation cascades(K)    | <i>F5,CD59</i>                                                | <i>C3AR1,SERPINA1,PLAT,PLAU,C5AR1,ITGAM,ITGB2,THBD,ITGAX,CR1,PLAUR</i>                                                       | <i>SERPINA1,ITGB2,ITGAX</i>                                            | 0.044                  |
|                                           | p=0.199                                                       | p=2.70x10 <sup>-07</sup>                                                                                                     | p=0.048                                                                |                        |
| <b>Tissue Damage/Tissue Repair</b>        |                                                               |                                                                                                                              |                                                                        |                        |
| Urokinase-type plasminogen                | <i>MMP9</i>                                                   |                                                                                                                              | <i>FN1,ITGB2,MMP9</i>                                                  | 7.77x10 <sup>-03</sup> |

Online supplement to Gene Expression Pathways across Multiple Tissues in Antineutrophil Cytoplasmic Antibody-associated Vasculitis Reveal Core Pathways of Disease Pathology, *The Journal of Rheumatology*, doi:10.3899/jrheum.180455

|                                                              |                            |                                                                                      |                                                          |                        |
|--------------------------------------------------------------|----------------------------|--------------------------------------------------------------------------------------|----------------------------------------------------------|------------------------|
| activator (uPA) and uPAR-mediated signaling(N)               |                            | <i>FPR1,FPR2, FN1,PLAU,ITGAM,ITGB2,PLAUR,MMP9,ITGA5</i>                              |                                                          |                        |
|                                                              | p=0.354                    | p=9.81x10 <sup>-08</sup>                                                             | p=9.39x10 <sup>-03</sup>                                 |                        |
| Extracellular matrix organization(R)                         | <i>COL9A2,MMP9,CEACAM8</i> | <i>SPARC,ICAM3,KLK7, FN1,TIMP2,SPP1,ADAM8,ITGAM,ITGB2,ITGAX,MMP9,ITGA5,THBS1,LUM</i> | <i>DMP1,COMP,ADAM8, FN1,ITGB2,ITGAL,ITGAX, MMP9,SPP1</i> | 0.024                  |
|                                                              | p=0.497                    | p=2.51x10 <sup>-04</sup>                                                             | p=1.27x10 <sup>-03</sup>                                 |                        |
| <b>Platelet Activation</b>                                   |                            |                                                                                      |                                                          |                        |
| Response to elevated platelet cytosolic Ca <sup>2+</sup> (R) | <i>F5</i>                  | <i>SPARC,PRKCB,CD109, FN1,FERMT3,ECM1,SERPINA1,FLNA,PLEK,SRGN,THBS1</i>              | <i>STXBP2, FN1,SERPINA1</i>                              | 0.038                  |
|                                                              | p=0.670                    | p=4.50x10 <sup>-06</sup>                                                             | p=0.095                                                  |                        |
| GPVI-mediated activation cascade(R)                          | <i>CSF2RA</i>              | <i>PIK3R5,RAC2,FCER1G, CSF2RB,LCP2</i>                                               | <i>JAK3,IL2RG,PDPN,PTPN11</i>                            | 0.079                  |
|                                                              | p=0.400                    | p=2.1x10 <sup>-03</sup>                                                              | p=1.69x10 <sup>-03</sup>                                 |                        |
| Platelet homeostasis(R)                                      | <i>SLC8A1,MRVI1,MAPK14</i> | <i>FGR</i>                                                                           | <i>SLC8A1,ITPR1,ATP2A3,PTPN11</i>                        | 0.091                  |
|                                                              | p=0.024                    | p=0.656                                                                              | p=3.28x10 <sup>-03</sup>                                 |                        |
| <b>Infectious Disease Pathways</b>                           |                            |                                                                                      |                                                          |                        |
| Leishmaniasis(K)                                             | <i>TLR2,MAPK3,MAPK14</i>   | <i>PRKCB,FOS,IL1B,TLR4, TLR2,PTGS2,NCF2,NCF4,ITGAM,ITGB2,FCGR3A,CR1,FCGR2A</i>       | <i>ITGB2,TLR2</i>                                        | 3.54x10 <sup>-03</sup> |
|                                                              | p=0.041                    | p=1.22x10 <sup>-09</sup>                                                             | p=0.172                                                  |                        |
| Malaria(K)                                                   | <i>TLR2</i>                | <i>HBB,HBA1,IL1B,TLR4, TLR2,ITGB2,CR1,THBS1</i>                                      | <i>COMP,ITGB2,ITGAL,TLR2</i>                             | 0.012                  |
|                                                              | p=0.400                    | p=3.77x10 <sup>-06</sup>                                                             | p=1.69x10 <sup>-03</sup>                                 |                        |

Online supplement to Gene Expression Pathways across Multiple Tissues in Antineutrophil Cytoplasmic Antibody-associated Vasculitis Reveal Core Pathways of Disease Pathology, *The Journal of Rheumatology*, doi:10.3899/jrheum.180455

|                                                                                                        |                                             |                                                                                                                           |                                                 |                        |
|--------------------------------------------------------------------------------------------------------|---------------------------------------------|---------------------------------------------------------------------------------------------------------------------------|-------------------------------------------------|------------------------|
| Tuberculosis(K)                                                                                        | <i>RAB5C,CAMP,TLR2,MAPK3,MAPK14</i>         | <i>CD14,PLK3,FCER1G,IL1B,TLR4,TLR2,IL10RA,CLEC4E,CORO1A,CLEC7A,ITGAM,ITGB2,FCGR3A,ITGAX,CR1,FCGR2A,FCGR2B</i>             | <i>CLEC7A,VDR,CIITA,ITGB2,TCIRG1,ITGAX,TLR2</i> | 0.019                  |
|                                                                                                        | p=0.040                                     | p=3.79x10 <sup>-08</sup>                                                                                                  | p=2.52x10 <sup>-03</sup>                        |                        |
| Measles(K)                                                                                             | <i>TLR2</i>                                 | <i>PIK3R5,IL1B,TLR4,TLR2,HSPA6,TNFRSF10C,FCGR2B</i>                                                                       | <i>SLAMF1,SH2D1A,JAK3,IKBKE,TLR2,IL2RG</i>      | 0.035                  |
|                                                                                                        | p=0.759                                     | p=0.012                                                                                                                   | p=2.84x10 <sup>-03</sup>                        |                        |
| Amoebiasis(K)                                                                                          | <i>IL1R1,IL1R2,RAB5C,SERPINB1,ARG1,TLR2</i> | <i>PRKCB,IL1R2,PIK3R5,CD14,FN1,IL1B,TLR4,TLR2,ITGAM,ITGB2</i>                                                             | <i>FN1,ITGB2,TLR2</i>                           | 0.142                  |
|                                                                                                        | p=5.97x10 <sup>-04</sup>                    | p=1.42x10 <sup>-05</sup>                                                                                                  | p=0.080                                         |                        |
| <b>Other</b>                                                                                           |                                             |                                                                                                                           |                                                 |                        |
| Osteoclast differentiation(K)                                                                          | <i>SPI1,IL1R1,SOCS3,MAPK3,MAPK14</i>        | <i>SPI1,JUNB,PIK3R5,FOS,IL1B,LILRA1,LILRA2,LILRA5,LILRB2,LILRB3,FOSB,NCF2,NCF4,TYROBP,SOCS3,FCGR3A,LCP2,FCGR2A,FCGR2B</i> | <i>SIRPB1,LILRA3*</i>                           | 3.75x10 <sup>-05</sup> |
|                                                                                                        | p=0.013                                     | p=6.19x10 <sup>-12</sup>                                                                                                  | p=0.391                                         |                        |
| Inflammatory bowel disease (IBD)(K)                                                                    | <i>IL18RAP,TLR5,TLR2,IL18R1</i>             | <i>IL1B,TLR4,TLR2,IL18RAP</i>                                                                                             | <i>FOXP3,TLR2,IL2RG,IL21R,IL12RB1</i>           | 0.093                  |
|                                                                                                        | p=4.91x10 <sup>-03</sup>                    | p=0.031                                                                                                                   | p=5.8x10 <sup>-04</sup>                         |                        |
| Transport of glucose and other sugars, bile salts and organic acids, metal ions and amine compounds(R) | <i>SLC11A1,SLC22A4,SLC40A1,SLC18A2</i>      | <i>SLC11A1</i>                                                                                                            | <i>SLC16A3,SLC11A1,SLC2A5</i>                   | 0.124                  |
|                                                                                                        | p=1.12x10 <sup>-03</sup>                    | p=0.540                                                                                                                   | p=0.01                                          |                        |

Online supplement to Gene Expression Pathways across Multiple Tissues in Antineutrophil Cytoplasmic Antibody-associated Vasculitis Reveal Core Pathways of Disease Pathology, *The Journal of Rheumatology*, doi:10.3899/jrheum.180455

|                                                                                                                                                                                                                                                                                                     |             |                                   |                          |       |
|-----------------------------------------------------------------------------------------------------------------------------------------------------------------------------------------------------------------------------------------------------------------------------------------------------|-------------|-----------------------------------|--------------------------|-------|
| Syndecan-4-mediated signaling events(N)                                                                                                                                                                                                                                                             | <i>MMP9</i> | <i>FN1,CXCR4,MMP9,ITGA5,THBS1</i> | <i>FN1,MMP9,CXCR4</i>    | 0.155 |
|                                                                                                                                                                                                                                                                                                     | p=0.283     | p=3.18x10 <sup>-04</sup>          | p=4.47x10 <sup>-03</sup> |       |
| <p>*md-localFDR = multi-dimensional local false discovery rate, which can be thought of as the probability of individual pathway being a false discovery in <i>all three</i> tissues.</p> <p>C = CellMap, R = Reactome, K = Kyoto Encyclopedia of Genes and Genomes (KEGG), N = National Cancer</p> |             |                                   |                          |       |

| <b>Supplementary Table 2: Downregulated pathways associated with two out of three tissues.</b>                                                                  |                                                                                                                                             |                                                                                                                    |
|-----------------------------------------------------------------------------------------------------------------------------------------------------------------|---------------------------------------------------------------------------------------------------------------------------------------------|--------------------------------------------------------------------------------------------------------------------|
| <b>Orbit and nasal sinus brushings</b>                                                                                                                          | <b>Orbit and leukocytes</b>                                                                                                                 | <b>Nasal sinus brushings and leukocytes</b>                                                                        |
| Metabolism of xenobiotics by cytochrome P450(K)<br>Orbit p=2.40x10 <sup>-03</sup> , FDR=0.077<br>Nasal p=2.00x10 <sup>-04</sup> ,<br>FDR=5.20x10 <sup>-03</sup> | Cytokine-cytokine receptor interaction(K)<br>Orbit p=0.069, FDR=0.162<br>Leukocyte p=3.05x10 <sup>-04</sup> ,<br>FDR=8.53x10 <sup>-03</sup> | IL12-mediated signaling events(N)<br>Nasal p=0.091, FDR=0.113<br>Leukocyte p=8.68x10 <sup>-03</sup> ,<br>FDR=0.069 |
| Drug metabolism - cytochrome P450(K)<br>Orbit p=0.026, FDR=0.162<br>Nasal p=1.70x10 <sup>-04</sup> ,<br>FDR=5.20x10 <sup>-03</sup>                              | Response to elevated platelet cytosolic Ca <sup>2+</sup> (R)<br>Orbit p=6.53x10 <sup>-03</sup> , FDR=0.127<br>Leukocyte p=0.217, FDR=0.217  | NOD-like receptor signaling pathway(K)<br>Nasal p=0.235, FDR=0.235<br>Leukocyte p=0.058, FDR=0.117                 |
| Tyrosine metabolism(K)<br>Orbit p=7.10x10 <sup>-03</sup> , FDR=0.127<br>Nasal p=0.053, FDR=0.113                                                                | Caspase cascade in apoptosis(N)<br>Orbit p=0.171, FDR=0.171<br>Leukocyte p=6.38x10 <sup>-03</sup> ,<br>FDR=0.060                            | Chagas disease (American trypanosomiasis)(K)<br>Nasal p=0.011, FDR=0.091<br>Leukocyte p=0.214, FDR=0.214           |
| Retinol metabolism(K)<br>Orbit p=0.209, FDR=0.209<br>Nasal p=1.37x10 <sup>-04</sup> ,<br>FDR=5.20x10 <sup>-03</sup>                                             | Malaria(K)<br>Orbit p=0.162, FDR=0.162<br>Leukocyte p=0.107, FDR=0.117                                                                      | Pathways in cancer(K)<br>Nasal p=0.126, FDR=0.126<br>Leukocyte p=0.062, FDR=0.117                                  |
| Chemical carcinogenesis(K)<br>Orbit p=0.035, FDR=0.162<br>Nasal p=2.70x10 <sup>-04</sup> ,<br>FDR=5.67x10 <sup>-03</sup>                                        | Signaling events mediated by PTP1B(N)<br>Orbit p=0.015, FDR=0.162<br>Leukocyte p=0.113, FDR=0.117                                           | Signaling by Interleukins(R)<br>Nasal p=0.160, FDR=0.160<br>Leukocyte p=0.087, FDR=0.117                           |
| Steroid hormone biosynthesis(K)<br>Orbit p=0.188, FDR=0.188<br>Nasal p=3.67x10 <sup>-03</sup> , FDR=0.029                                                       | Adherens junction(K)<br>Orbit p=0.228, FDR=0.228<br>Leukocyte p=0.153, FDR=0.153                                                            | Cytosolic DNA-sensing pathway(K)<br>Nasal p=0.096, FDR=0.113<br>Leukocyte p=0.137, FDR=0.137                       |
| Fatty acid degradation(K)<br>Orbit p=0.146, FDR=0.162<br>Nasal p=0.067, FDR=0.113                                                                               | Viral myocarditis(K)<br>Orbit p=0.191, FDR=0.191<br>Leukocyte p=0.127, FDR=0.127                                                            | Circadian entrainment(K)<br>Nasal p=0.14, FDR=0.14<br>Leukocyte p=0.199, FDR=0.199                                 |
| AP-1 transcription factor network(N)<br>Orbit p=0.223, FDR=0.223                                                                                                | Integration of energy metabolism(R)<br>Orbit p=0.043, FDR=0.162                                                                             | Melanogenesis(K)<br>Nasal p=0.147, FDR=0.147<br>Leukocyte p=0.208, FDR=0.208                                       |



Online supplement to Gene Expression Pathways across Multiple Tissues in Antineutrophil Cytoplasmic Antibody-associated Vasculitis Reveal Core Pathways of Disease Pathology, *The Journal of Rheumatology*, doi:10.3899/jrheum.180455

|                                                                                                                                                                    |                              |                                                                                                     |
|--------------------------------------------------------------------------------------------------------------------------------------------------------------------|------------------------------|-----------------------------------------------------------------------------------------------------|
| Nasal p=0.104, FDR=0.113                                                                                                                                           | Leukocyte p=0.192, FDR=0.192 |                                                                                                     |
| Phase 1 - Functionalization of compounds(R)<br>Orbit p=0.031, FDR=0.162<br>Nasal p=0.113, FDR=0.113                                                                |                              | Retrograde endocannabinoid signaling(K)<br>Nasal p=0.147, FDR=0.147<br>Leukocyte p=0.208, FDR=0.208 |
| Glycolysis / Gluconeogenesis(K)<br>Orbit p=0.214, FDR=0.214<br>Nasal p=0.010, FDR=0.113                                                                            |                              | Cholinergic synapse(K)<br>Nasal p=0.160, FDR=0.160<br>Leukocyte p=0.226, FDR=0.226                  |
| Signaling by Retinoic Acid(R)<br>Orbit p=0.115, FDR=0.162<br>Nasal p=0.052, FDR=0.113                                                                              |                              | Serotonergic synapse(K)<br>Nasal p=0.163, FDR=0.163<br>Leukocyte p=0.23, FDR=0.23                   |
| Long-term potentiation(K)<br>Orbit p=0.214, FDR=0.214<br>Nasal p=0.010, FDR=0.113                                                                                  |                              | Glutamatergic synapse(K)<br>Nasal p=0.164, FDR=0.164<br>Leukocyte p=0.232, FDR=0.232                |
|                                                                                                                                                                    |                              | Sphingolipid signaling pathway(K)<br>Nasal p=0.172, FDR=0.172<br>Leukocyte p=0.242, FDR=0.242       |
| R = Reactome, K = Kyoto Encyclopedia of Genes and Genomes (KEGG), N = National Cancer Institute Pathway Interaction Database (NCI PID), FDR = false discovery rate |                              |                                                                                                     |
